# Supplementary material for: Viscoelastic behaviour and relaxation modes of one polyamic acid organogel studied by rheometers and dynamic light scattering
Source: Royal Society of Chemistry journal article supplement (doi:10.1039/c7sm02185b), 2017-12-04
Supplement: c7sm02185b1.pdf [file c7sm02185b1.pdf]

Electronic supplementary information

# Viscoelastic behaviour and relaxation modes of one polyamic acid organogel studied by rheometers and dynamic light scattering

Ensong Zhang,<sup>a</sup> Yong Zhao,<sup>b</sup> Wenke Yang,<sup>a</sup> Hongxiang Chen,<sup>a</sup> Wei Liu,<sup>a</sup>

Xuemin Dai,<sup>b</sup> Xuepeng Qiu,<sup>\*b</sup> and Xiangling Ji<sup>\*a</sup>

<sup>a</sup> State Key Laboratory of Polymer Physics and Chemistry, Changchun Institute of Applied Chemistry, Chinese Academy of Sciences, Changchun 130022, People's Republic of China

<sup>b</sup> Laboratory of Polymer Composites and Engineering, Changchun Institute of Applied Chemistry, Chinese Academy of Sciences, Changchun 130022, People's Republic of China

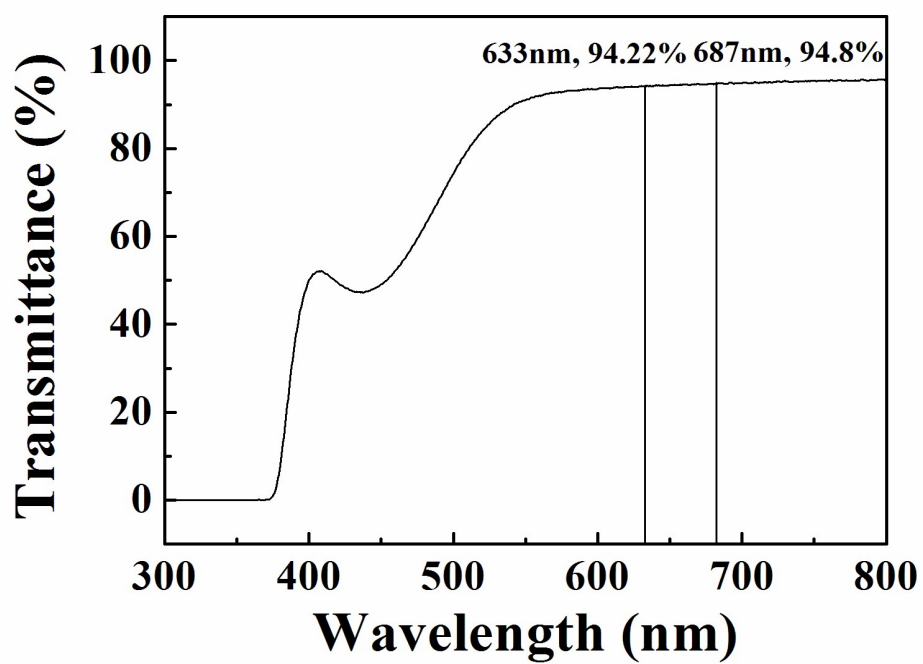

**Fig. S1.** UV-visible spectrum of PAA gel.

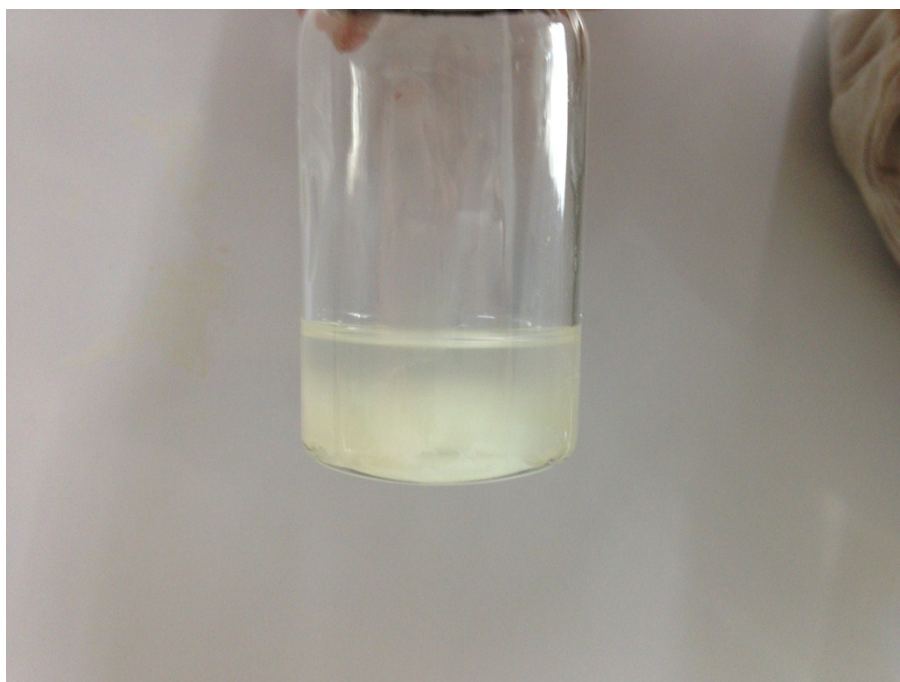

**Fig. S2.** PAA gel with excessive solvent DMAc.
